# Supplementary material
Source: publisher figshare collection journal article supplement (https://acs.figshare.com/ndownloader/files/4262539)
Supplement: Supplementary file 1 [file 4262539]

## Graphical TOC

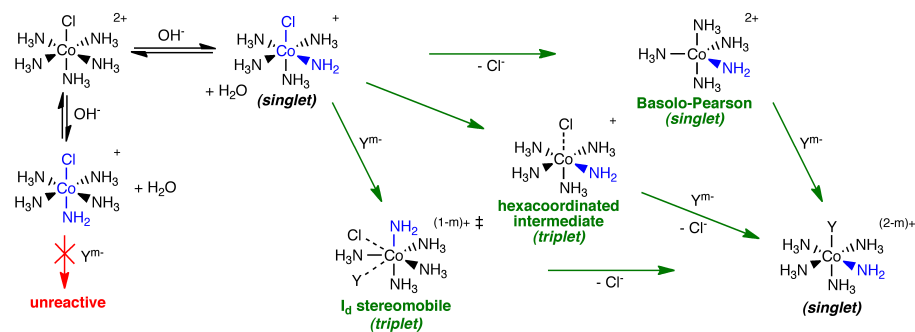

The base hydrolysis reaction of the chloro pentaammine cobalt(III) ion proceeds via the *cis* isomer of the conjugate base and three pathways involving (i) a trigonal bipyramidal pentacoordinated intermediate, (ii) a hexacoordinated intermediate with a triplet state, and (iii) an  $\text{I}_d$  transition state exhibiting a triplet state.
